# Supplementary material
Source: Springer Nature journal article supplement (https://www.springermedizin.de/resource/supplementary/12985_2011_1371_MOESM2_ESM.pdf/9609660)
Supplement: MOESM2 [file 9609660]

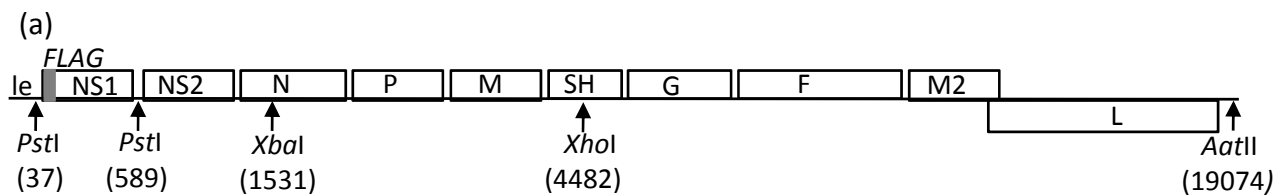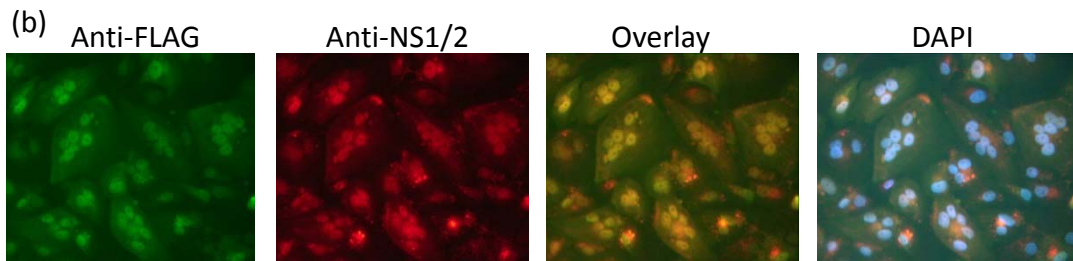

(c)

|                 |                           |
|-----------------|---------------------------|
|                 | <u>Region of homology</u> |
| SOCS1           | <u>VRPLQELC</u>           |
| SOCS3           | <u>VATLQHLC</u>           |
| VHL             | <u>VYTLKERC</u>           |
| NS1             | <u>VALLKITC</u>           |
| Consensus       | <u>VXXLXXXC</u>           |
| Mutation in NS1 | <u>AALAKITA</u>           |

(d)

|                 |            |            |            |   |     |   |   |   |
|-----------------|------------|------------|------------|---|-----|---|---|---|
|                 | V          | A          | L          | L | K   | I | T | C |
|                 | 160        |            | 170        |   | 180 |   |   |   |
| rRSVNS1F        | AGTAGCATTG | TTAAAAATAA | CATGCTATAC |   |     |   |   |   |
| rRSVNS1F-ELCmut | AGCAGCATTG | GCAAAAATAA | CAGCCTATAC |   |     |   |   |   |
|                 | A          | A          | L          | A | K   | I | T | A |
